# Supplementary material for: Boosting performances of triboelectric nanogenerators by optimizing dielectric properties and thickness of electrification layer
Source: Royal Society of Chemistry journal article supplement (doi:10.1039/d0ra02181d), 2020-01-01
Supplement: d0ra02181d1.pdf [file d0ra02181d1.pdf]

## Supporting Information

### **Boosting Performances of Triboelectric Nanogenerators by Optimizing Dielectric Properties and Thickness of Electrification Layer**

Xiaofang Kang<sup>a,b</sup>, Chongxiang Pan<sup>a,c</sup>, Yanghui Chen<sup>a,b</sup>, Xiong Pu<sup>a, b, c\*</sup>

<sup>a</sup> *CAS Center for Excellence in Nanoscience, Beijing Key Laboratory of Micro-Nano Energy and Sensor, Beijing Institute of Nanoenergy and Nanosystems, Chinese Academy of Sciences, Beijing 100083, China.*

<sup>b</sup> *School of Nanoscience and Technology, University of Chinese Academy of Sciences, Beijing 100049, China.*

<sup>c</sup> *Center on Nanoenergy Research, School of Chemistry and Chemical Engineering, School of Physical Science and Technology, Guangxi University, Nanning 530004, China.*

\* Corresponding author. E-mail: puxiong@binn.cas.cn

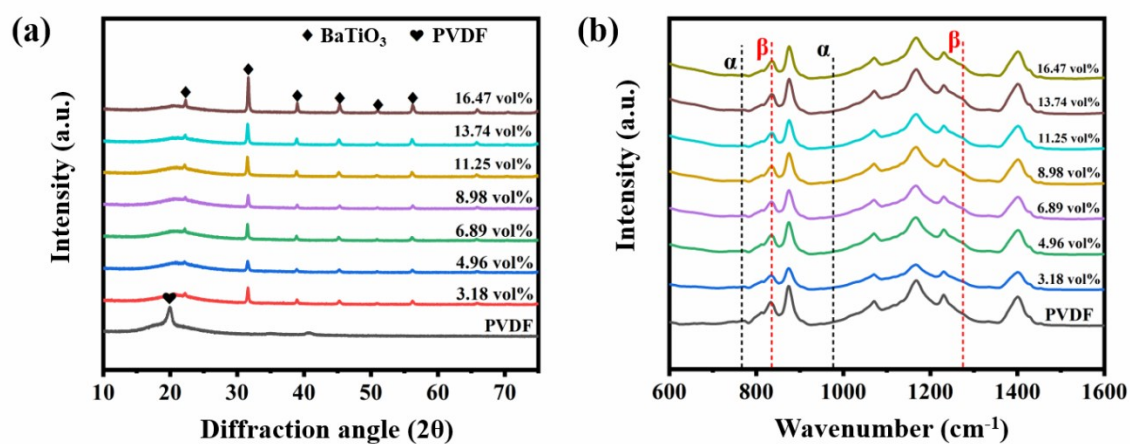

**Fig. S1.** (a) XRD patterns and (b) FTIR spectra of BaTiO<sub>3</sub>/PVDF nanocomposite films with different filler contents.

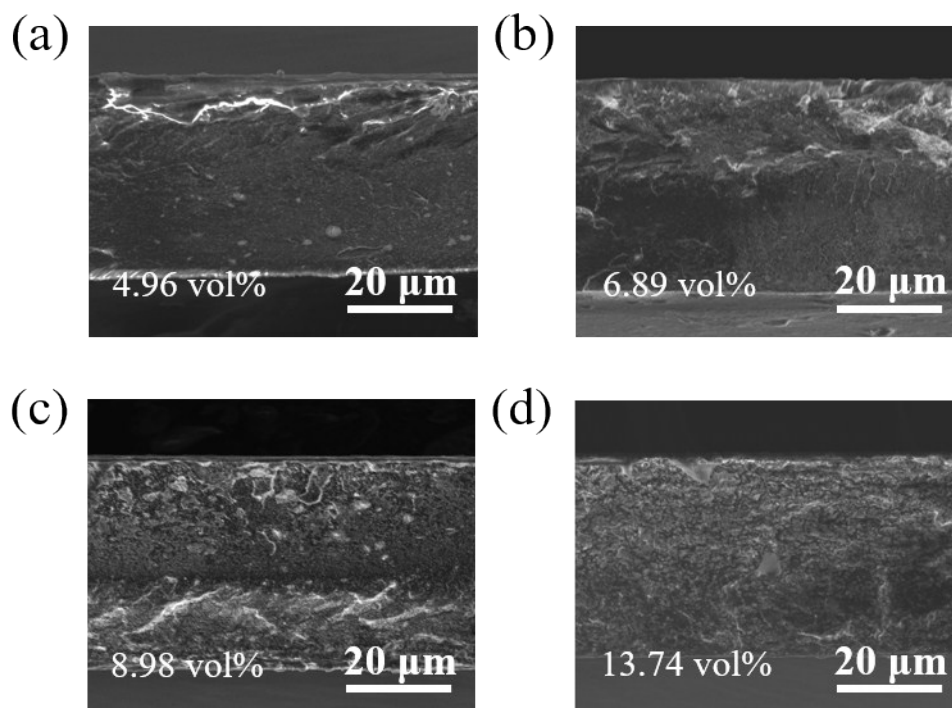

**Fig. S2.** Cross-sectional SEM images for PVDF-based films with various BaTiO<sub>3</sub> volume fraction (4.96 vol%. 6.89 vol%. 8.98 vol%. 13.74 vol%).

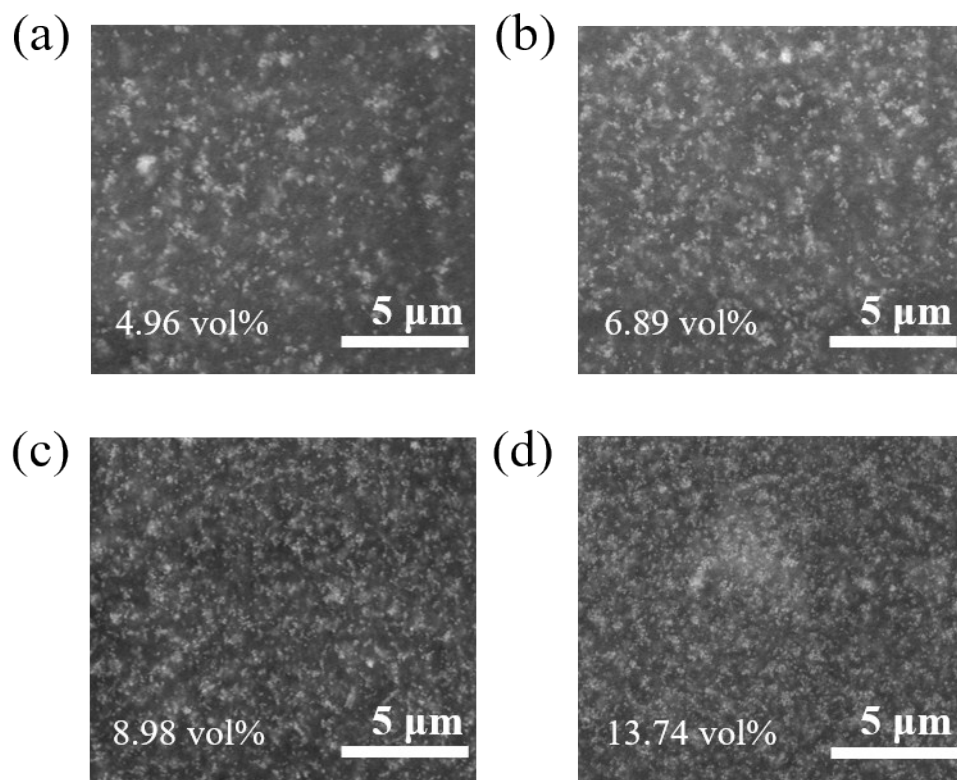

**Fig. S3.** Cross-sectional SEM images for PVDF-based films with various BaTiO<sub>3</sub> volume fraction (4.96 vol%. 6.89 vol%. 8.98 vol%. 13.74 vol%).

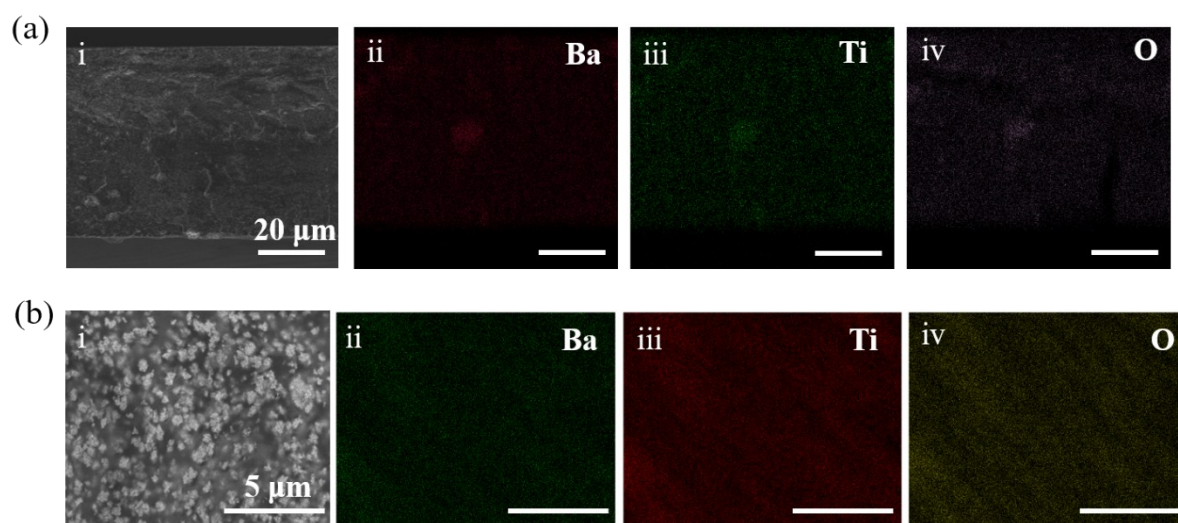

**Fig. S4.** (a) (b) The elemental mapping showing the dispersion states of nanoparticles in the representative BaTiO<sub>3</sub>/PVDF composite film with 11.25 vol%.

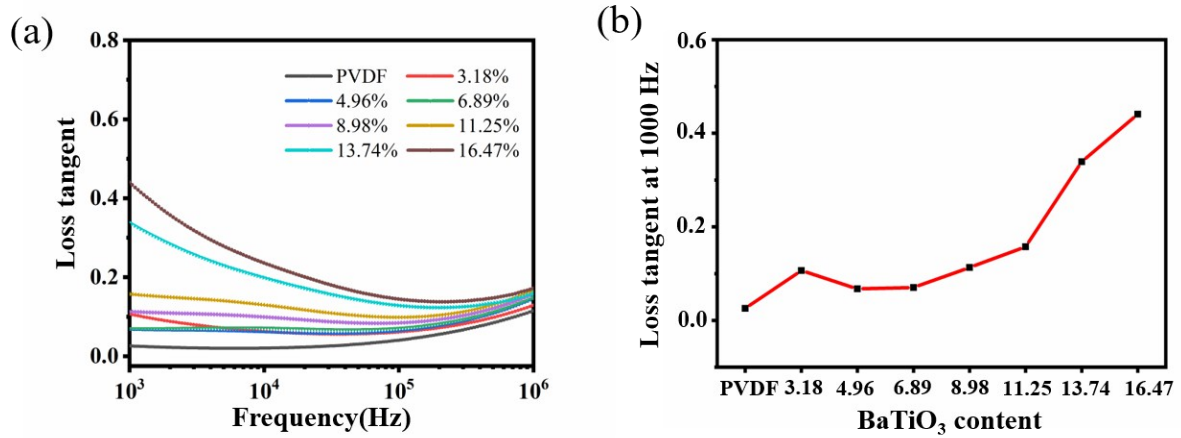

**Fig. S5.** (a) Frequency dependence of dielectric loss values for PVDF-based films with various BaTiO<sub>3</sub> volume fraction ranging from 0 to 16.47 vol%. The variation of (b) dielectric loss at 1000 Hz for PVDF-based films with various BaTiO<sub>3</sub> volume fraction.

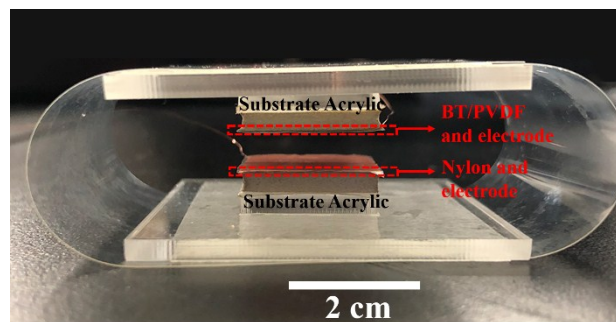

**Fig. S6.** A photograph of as-fabricated TENGs.

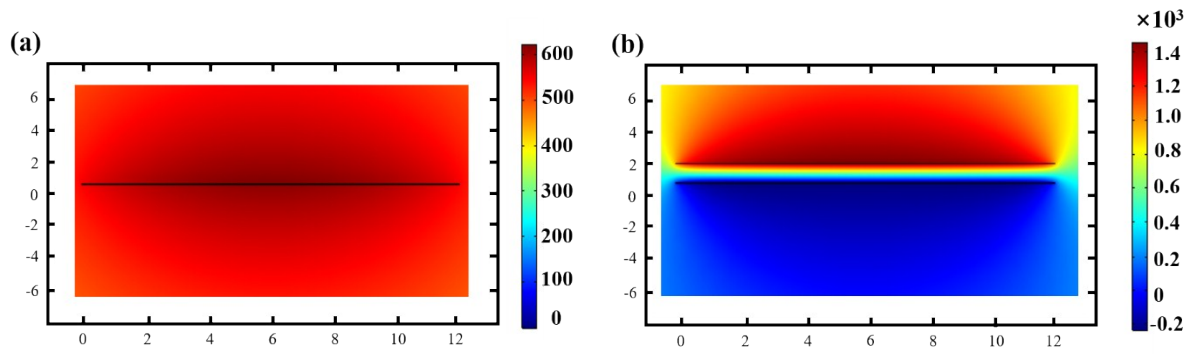

**Fig. S7.** Potential distribution of TENG. (a) the gap distance is 5  $\mu\text{m}$ . (a) the gap distance is 1 mm.

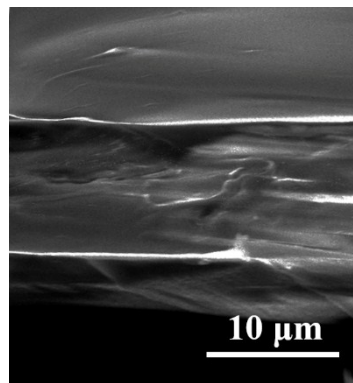

**Fig. S8.** Cross-sectional SEM image of Nylon.
